# Supplementary material
Source: PubMed Central journal article supplement (PMC5277507)
Supplement: JCM.01988-16_zjm999095332s1.pdf [file JCM.01988-16_zjm999095332s1.pdf]

TABLE S1. Reference strains tested in the present study (n=48)

|    | Bacterial species                          | Strain number | Esculin hydrolysis |
|----|--------------------------------------------|---------------|--------------------|
| 1  | <i>Acinetobacter baumannii</i>             | ATCC 19606    | No                 |
| 2  | <i>Acinetobacter baumannii</i>             | ATCC 17959    | No                 |
| 3  | <i>Bacteroides fragilis</i>                | ATCC 25285    | Yes                |
| 4  | <i>Bacteroides ovatus</i>                  | ATCC BAA 1296 | Yes                |
| 5  | <i>Brevundimonas diminuta</i>              | ATCC 11568    | No                 |
| 6  | <i>Citrobacter freundii</i>                | ATCC 8090     | No                 |
| 7  | <i>Clostridium perfringens</i>             | ATCC 13124    | No                 |
| 8  | <i>Clostridium septicum</i>                | ATCC 12464    | Yes                |
| 9  | <i>Enterobacter cloacae</i>                | ATCC 13047    | Yes                |
| 10 | <i>Enterobacter cloacae</i>                | ATCC 23355    | Yes                |
| 11 | <i>Enterobacter cloacae</i>                | ATCC 700323   | Yes                |
| 12 | <i>Enterococcus casseliflavus</i>          | ATCC 700327   | Yes                |
| 13 | <i>Enterococcus durans</i>                 | ATCC 6056     | Yes                |
| 14 | <i>Enterococcus faecalis</i>               | ATCC 29212    | Yes                |
| 15 | <i>Enterococcus faecalis</i>               | ATCC 51299    | Yes                |
| 16 | <i>Escherichia coli</i>                    | ATCC 25922    | No                 |
| 17 | <i>Escherichia coli</i>                    | ATCC 35218    | No                 |
| 18 | <i>Fusobacterium nucleatum</i>             | ATCC 25586    | No                 |
| 19 | <i>Klebsiella oxytoca</i>                  | ATCC 700324   | Yes                |
| 20 | <i>Klebsiella pneumoniae</i>               | ATCC 13883    | Yes                |
| 21 | <i>Klebsiella pneumoniae</i>               | ATCC 700603   | Yes                |
| 22 | <i>Kocuria rosea</i>                       | ATCC 186      | No                 |
| 23 | <i>Lactobacillus rhamnosus</i>             | ATCC 7469     | Yes                |
| 24 | <i>Peptostreptococcus anaerobius</i>       | ATCC27337     | No                 |
| 25 | <i>Peptostreptococcus assacharolyticus</i> | UKQC5267      | No                 |
| 26 | <i>Prevotella melaninogenica</i>           | UKQC5575      | No                 |
| 27 | <i>Proteus mirabilis</i>                   | ATCC 7002     | No                 |
| 28 | <i>Proteus vulgaris</i>                    | ATCC 6380     | Yes                |
| 29 | <i>Providencia stuartii</i>                | ATCC 25826    | No                 |
| 30 | <i>Pseudomonas aeruginosa</i>              | ATCC 27853    | No                 |
| 31 | <i>Salmonella typhimurium</i>              | ATCC 14028    | No                 |
| 32 | <i>Staphylococcus aureus</i>               | ATCC BAA 1708 | No                 |
| 33 | <i>Staphylococcus aureus</i>               | ATCC 25923    | No                 |
| 34 | <i>Staphylococcus aureus</i>               | ATCC 29213    | No                 |
| 35 | <i>Staphylococcus aureus</i>               | ATCC 43300    | No                 |

|    | Bacterial species                   | Strain number | Esculin hydrolysis |
|----|-------------------------------------|---------------|--------------------|
| 36 | <i>Staphylococcus epidermidis</i>   | ATCC 14990    | No                 |
| 37 | <i>Staphylococcus hominis</i>       | ATCC 27844    | No                 |
| 38 | <i>Staphylococcus lugdunensis</i>   | ATCC 700328   | No                 |
| 39 | <i>Staphylococcus saprophyticus</i> | ATCC BAA-750  | No                 |
| 40 | <i>Staphylococcus sciuri</i>        | ATCC 29061    | Yes                |
| 41 | <i>Staphylococcus simulans</i>      | ATCC 27848    | No                 |
| 42 | <i>Stenotrophomonas maltophilia</i> | ATCC 17666    | Yes                |
| 43 | <i>Streptococcus agalactiae</i>     | ATCC 13813    | No                 |
| 44 | <i>Streptococcus pneumoniae</i>     | ATCC 49619    | No                 |
| 45 | <i>Streptococcus pneumoniae</i>     | ATCC 6305     | No                 |
| 46 | <i>Streptococcus pyogenes</i>       | ATCC 19615    | No                 |
| 47 | <i>Streptococcus thermophilus</i>   | ATCC 19258    | No                 |
| 48 | <i>Vibrio parahaemolyticus</i>      | ATCC 43996    | No                 |

TABLE S2. Clinical isolates tested in the present study (n=255)

| Isolate type and organism                       | No. of isolates | No. esculin positive |
|-------------------------------------------------|-----------------|----------------------|
| Anaerobic bacteria (207)                        |                 |                      |
| <i>Bacteroides caccae</i>                       | 4               | 4                    |
| <i>Bacteroides dorei</i>                        | 4               | 4                    |
| <i>Bacteroides eggerthii</i>                    | 1               | 1                    |
| <i>Bacteroides fragilis</i> (division I)        | 51              | 51                   |
| <i>Bacteroides fragilis</i> (division II)       | 52              | 52                   |
| <i>Bacteroides intestinalis</i>                 | 2               | 2                    |
| <i>Bacteroides massiliensis</i>                 | 1               | 0                    |
| <i>Bacteroides nordii</i>                       | 4               | 4                    |
| <i>Bacteroides ovatus</i>                       | 10              | 10                   |
| <i>Bacteroides pyogenes</i>                     | 2               | 0                    |
| <i>Bacteroides salyersiae</i>                   | 2               | 2                    |
| <i>Bacteroides stercoris</i>                    | 2               | 2                    |
| <i>Bacteroides thetaiotaomicron</i>             | 10              | 10                   |
| <i>Bacteroides uniformis</i>                    | 10              | 10                   |
| <i>Bacteroides vulgatus</i>                     | 10              | 4                    |
| <i>Bifidobacterium bifidum</i>                  | 1               | 0                    |
| <i>Clostridium hathewayi</i>                    | 1               | 1                    |
| <i>Clostridium perfringens</i>                  | 10              | 0                    |
| <i>Clostridium sordellii</i>                    | 1               | 0                    |
| <i>Clostridium tertium</i>                      | 1               | 1                    |
| <i>Finegoldia magna</i>                         | 1               | 0                    |
| <i>Fusobacterium mortiferum</i>                 | 1               | 0                    |
| <i>Fusobacterium varium</i>                     | 1               | 0                    |
| <i>Parabacteroides distasonis</i>               | 2               | 2                    |
| <i>Parabacteroides faecis</i>                   | 2               | 0                    |
| <i>Parabacteroides goldsteinii</i>              | 2               | 0                    |
| <i>Parvimonas micra</i>                         | 1               | 0                    |
| <i>Peptostreptococcus anaerobius</i>            | 1               | 0                    |
| <i>Prevotella amnii</i>                         | 1               | 0                    |
| <i>Prevotella bivia</i>                         | 4               | 0                    |
| <i>Prevotella buccae</i>                        | 1               | 1                    |
| <i>Prevotella disiens</i>                       | 1               | 0                    |
| <i>Prevotella intermedia</i>                    | 3               | 0                    |
| <i>Prevotella melaninogenica</i>                | 4               | 0                    |
| <i>Prevotella nigrescens</i>                    | 1               | 0                    |
| <i>Propionibacterium acnes</i>                  | 1               | 0                    |
| <i>Veillonella parvula</i>                      | 1               | 0                    |
| Aerobic and facultative anaerobic bacteria (48) |                 |                      |
| <i>Aeromonas hydrophilia</i>                    | 1               | 1                    |
| <i>Enterococcus faecium</i>                     | 1               | 1                    |
| <i>Enterococcus gallinarum</i>                  | 1               | 1                    |
| <i>Escherichia coli</i>                         | 1               | 0                    |

|                                       |     |     |
|---------------------------------------|-----|-----|
| <i>Flavobacterium meningosepticum</i> | 1   | 1   |
| <i>Lactobacillus gasseri</i>          | 1   | 1   |
| <i>Lactobacillus paracasei</i>        | 1   | 1   |
| <i>Lactobacillus rhamnosus</i>        | 2   | 2   |
| <i>Listeria monocytogenes</i>         | 1   | 1   |
| <i>Plesiomonas shigelloides</i>       | 1   | 0   |
| <i>Pseudomonas aeruginosa</i>         | 1   | 0   |
| <i>Serratia marcescens</i>            | 1   | 1   |
| <i>Staphylococcus artlettae</i>       | 1   | 0   |
| <i>Staphylococcus aureus</i>          | 2   | 0   |
| <i>Staphylococcus epidermidis</i>     | 2   | 0   |
| <i>Staphylococcus equorum</i>         | 1   | 0   |
| <i>Staphylococcus haemolyticus</i>    | 1   | 0   |
| <i>Staphylococcus kloosii</i>         | 1   | 0   |
| <i>Staphylococcus lugdunensis</i>     | 1   | 0   |
| <i>Staphylococcus saprophyticus</i>   | 1   | 0   |
| <i>Staphylococcus sciuri</i>          | 2   | 2   |
| <i>Staphylococcus xylosum</i>         | 1   | 0   |
| <i>Streptococcus agalactiae</i>       | 2   | 0   |
| <i>Streptococcus anginosus</i>        | 1   | 0   |
| <i>Streptococcus bovis</i>            | 3   | 3   |
| <i>Streptococcus constellatus</i>     | 1   | 0   |
| <i>Streptococcus dysgalactiae</i>     | 3   | 0   |
| <i>Streptococcus milleri group</i>    | 1   | 0   |
| <i>Streptococcus mitis</i>            | 2   | 0   |
| <i>Streptococcus mutans</i>           | 1   | 1   |
| <i>Streptococcus pyogenes</i>         | 3   | 0   |
| <i>Vibrio alginolyticus</i>           | 1   | 1   |
| <i>Vibrio fluvialis</i>               | 1   | 0   |
| <i>Vibrio parahaemolyticus</i>        | 1   | 0   |
| <i>Vibrio vulnificus</i>              | 1   | 1   |
| <i>Vibrio xuii</i>                    | 1   | 0   |
| Total                                 | 255 | 179 |
